# Supplementary material for: Modeling assortative mating and genetic similarities between partners, siblings, and in-laws
Source: PubMed Central journal article supplement (PMC8888605; doi:10.1038/s41467-022-28774-y), 2022-03-01
Supplement: 41467_2022_28774_MOESM3_ESM.pdf [file 41467_2022_28774_MOESM3_ESM.pdf]

### **Description of Additional Supplementary Files**

File Name: Supplementary Software 1

Description: R language script to simulate assortative mating across multiple generations and fit the Correlations in Genetic Signal (rGenSi) model.
